# Supplementary material for: The natural product carolacton inhibits folate-dependent C1 metabolism by targeting FolD/MTHFD
Source: PubMed Central journal article supplement (PMC5688156; doi:10.1038/s41467-017-01671-5), 2017-11-16
Supplement: 41467_2017_1671_MOESM1_ESM.pdf [file 41467_2017_1671_MOESM1_ESM.pdf]

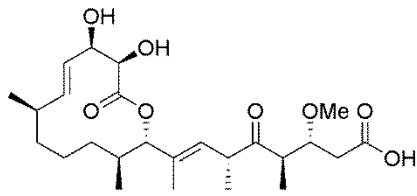

Carolacton

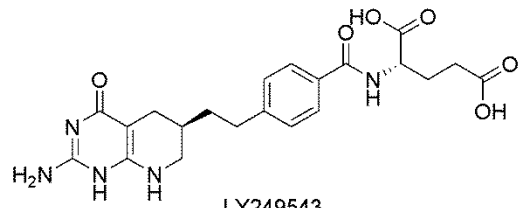

LY249543

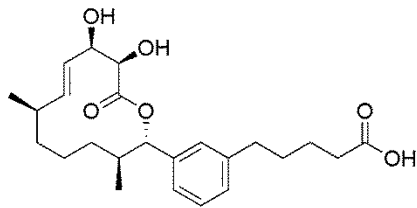

Carylacton

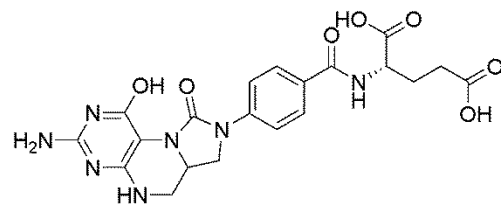

LY345899

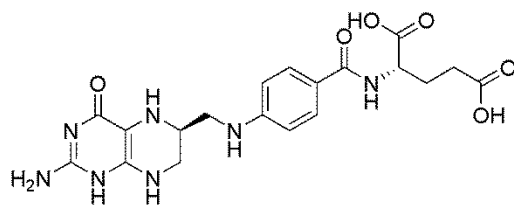

Tetrahydrofolate

**Supplementary Figure 1. Chemical structures of compounds mentioned in this paper.**

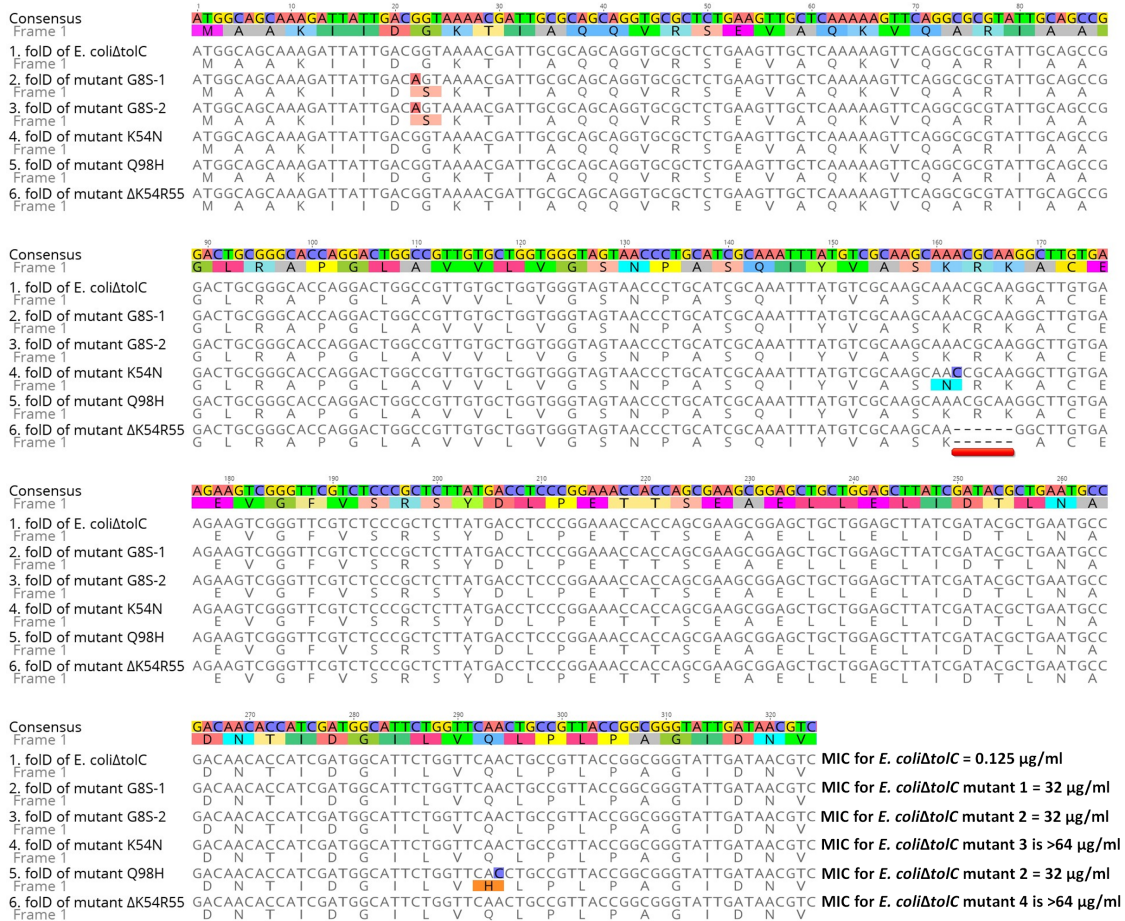

**Supplementary Figure 2. Partial alignment of *folD* genes and MIC of *E. coli*Δ*tolC* wt and four carolacton-resistant mutants.** All point mutations and base deletions were highlighted in different colours. The *folD* gene of mutant ΔK54R55 has a 6 bp deletion affecting the codons for Lysine 54, Arginine 55 and Lysine 56. The MIC values of carolacton against *E. coli*Δ*tolC* wt strain and five carolacton-resistant mutants are shown at the end of alignments.

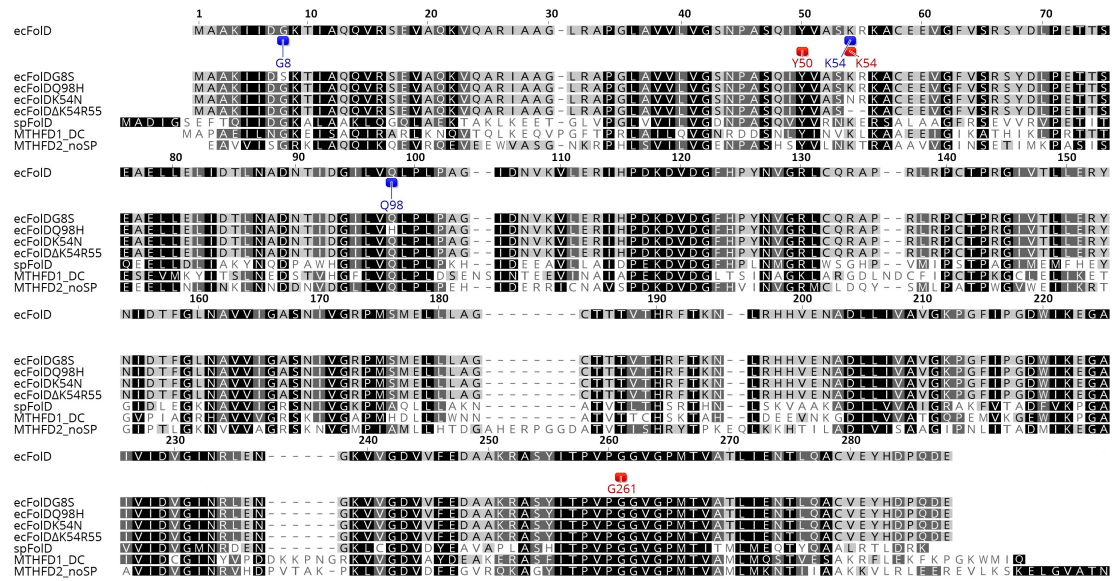

**Supplementary Figure 3. Alignment of FOLD enzymes studied in this paper.** The residues indicated by blue squares are residues mutated in FOLD proteins from carolacton-resistant mutants. The residues indicated by red squares are important for carolacton binding. The numbering of residues is according to ecFold.

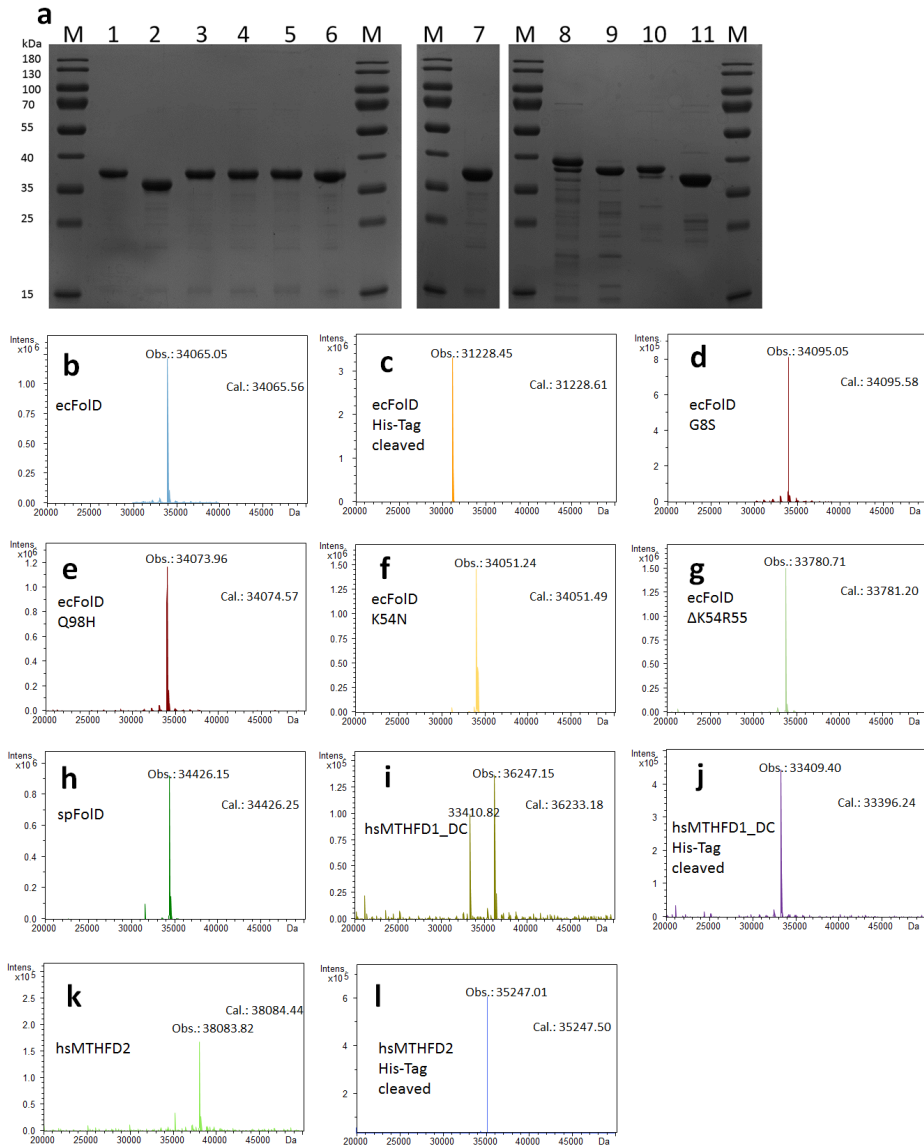

**Supplementary Figure 4. All purified FOLD proteins analyzed by SDS-PAGE and LC-MS. (a)** The SDS-PAGE gel of all purified FOLDS. M: PageRuler prestained protein ladder; 1: His-Tag fusion FOLD of *E. coli*Δ*tolC*; 2: FOLD of *E. coli*Δ*tolC* (His-tag cleaved off) 3: His-Tag fusion FOLD of *E. coli*Δ*tolC* G8S; 4: His-Tag fusion FOLD of *E. coli*Δ*tolC* Q98H; 5: His-Tag fusion FOLD of *E. coli*Δ*tolC* K54N; 6: His-Tag fusion FOLD of *E. coli*Δ*tolC* ΔK54R55; 7: His-Tag fusion FOLD of *S. pneumoniae* TIGR4; 8: His-Tag fusion hsMTHFD1\_DC; 9: His-Tag cleaved hsMTHFD1\_DC; 10: His-Tag fusion hsMTHFD2; 11: His-Tag cleaved hsMTHFD2. **(b-l)** Deconvoluted mass spectra of all FOLD proteins. Cal. stands for calculated average neutral mass according to the protein sequence; Obs. indicates the average neutral mass observed by LC-MS measurement. The mass of hsMTHFD1\_DC is 14 Da heavier than its calculated mass, which is possibly the result of methylation on one residue.

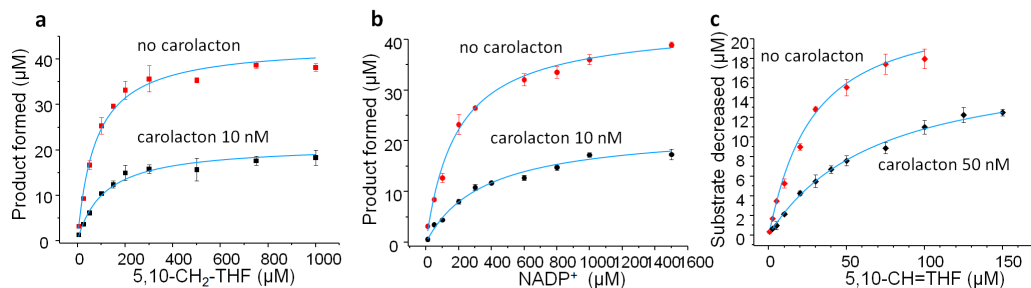

**Supplementary Figure 5. Enzyme kinetics of ecFold.** Data are presented as means  $\pm$  s.e.m of 3 independent replicates. Enzyme specific activity values were calculated based on the  $V_{max}$  values obtained via Michaelis-Menten or Hill fitting. The one-way ANOVA test was used for statistical analysis,  $P < 0.01$ . **(a)** The determination of 5,10-CH<sub>2</sub>-THF  $K_M$  in the presence of 1 mM NADP<sup>+</sup> and 5,10-CH<sub>2</sub>-THF apparent  $K_M$  in the presence of 1 mM NADP<sup>+</sup> and 10 nM carolacton. **(b)** The determination of NADP<sup>+</sup>  $K_M$  in the presence of 1 mM 5,10-CH<sub>2</sub>-THF and NADP<sup>+</sup> apparent  $K_M$  in the presence of 1 mM 5,10-CH<sub>2</sub>-THF and 10 nM carolacton. **(c)** The determination of 5,10-CH=THF  $K_M$  and the determination of 5,10-CH=THF apparent  $K_M$  in the presence of 50 nM carolacton.

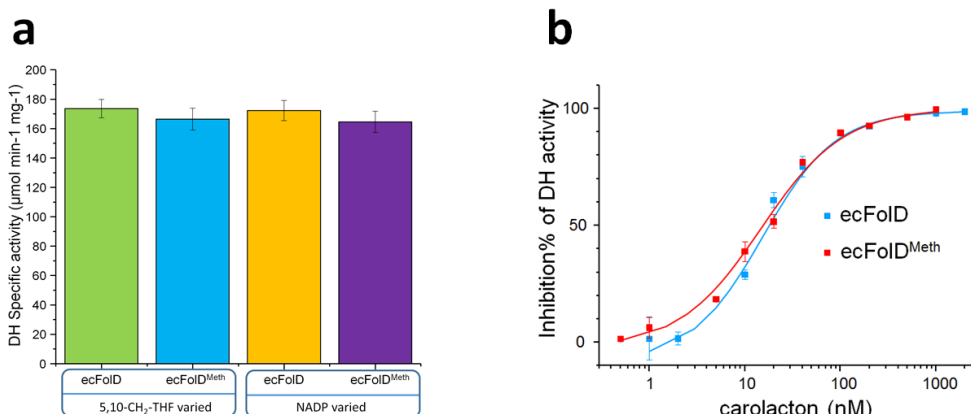

**Supplementary Figure 6. The comparison between ecFolD and ecFolD<sup>Meth</sup> (The lysine methylation processed ecFolD).** (a) The column plot for the comparison of DH activity of ecFolD and ecFolD<sup>Meth</sup>, the specific activity calculated based on varied 5,10-CH<sub>2</sub>-THF and NADP<sup>+</sup> both showed. Data are presented as means ± s.e.m of 3 independent replicates. DH specific activity values were calculated based on the  $V_{max}$  values obtained via Michaelis-Menten fitting. The one-way ANOVA test was used for statistical analysis,  $P < 0.01$ . (b) The determination of IC<sub>50</sub> for carolacton inhibition against ecFolD and ecFolD<sup>Meth</sup>. Data are presented as means ± s.e.m of 3 independent replicates. IC<sub>50</sub> values were obtained via logistic dose–response fitting. The one-way ANOVA test was used for statistical analysis,  $P < 0.01$ .

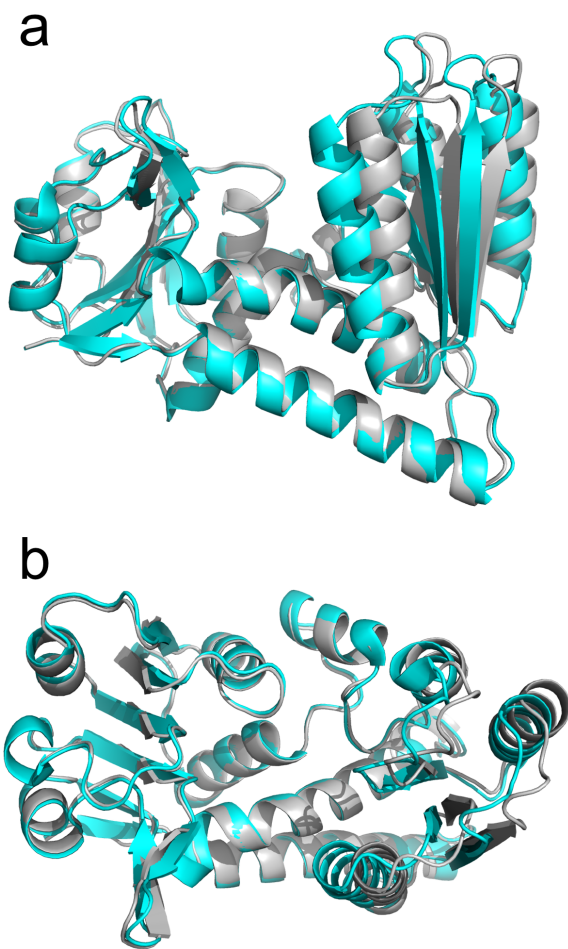

**Supplementary Figure 7. Superposition of ecFOLD crystallized in this study (gray) with the published structure (PDB ID 1B0A, cyan). (a) Side view. (b) Structures rotated by 90 ° around the horizontal axis towards the viewer.**

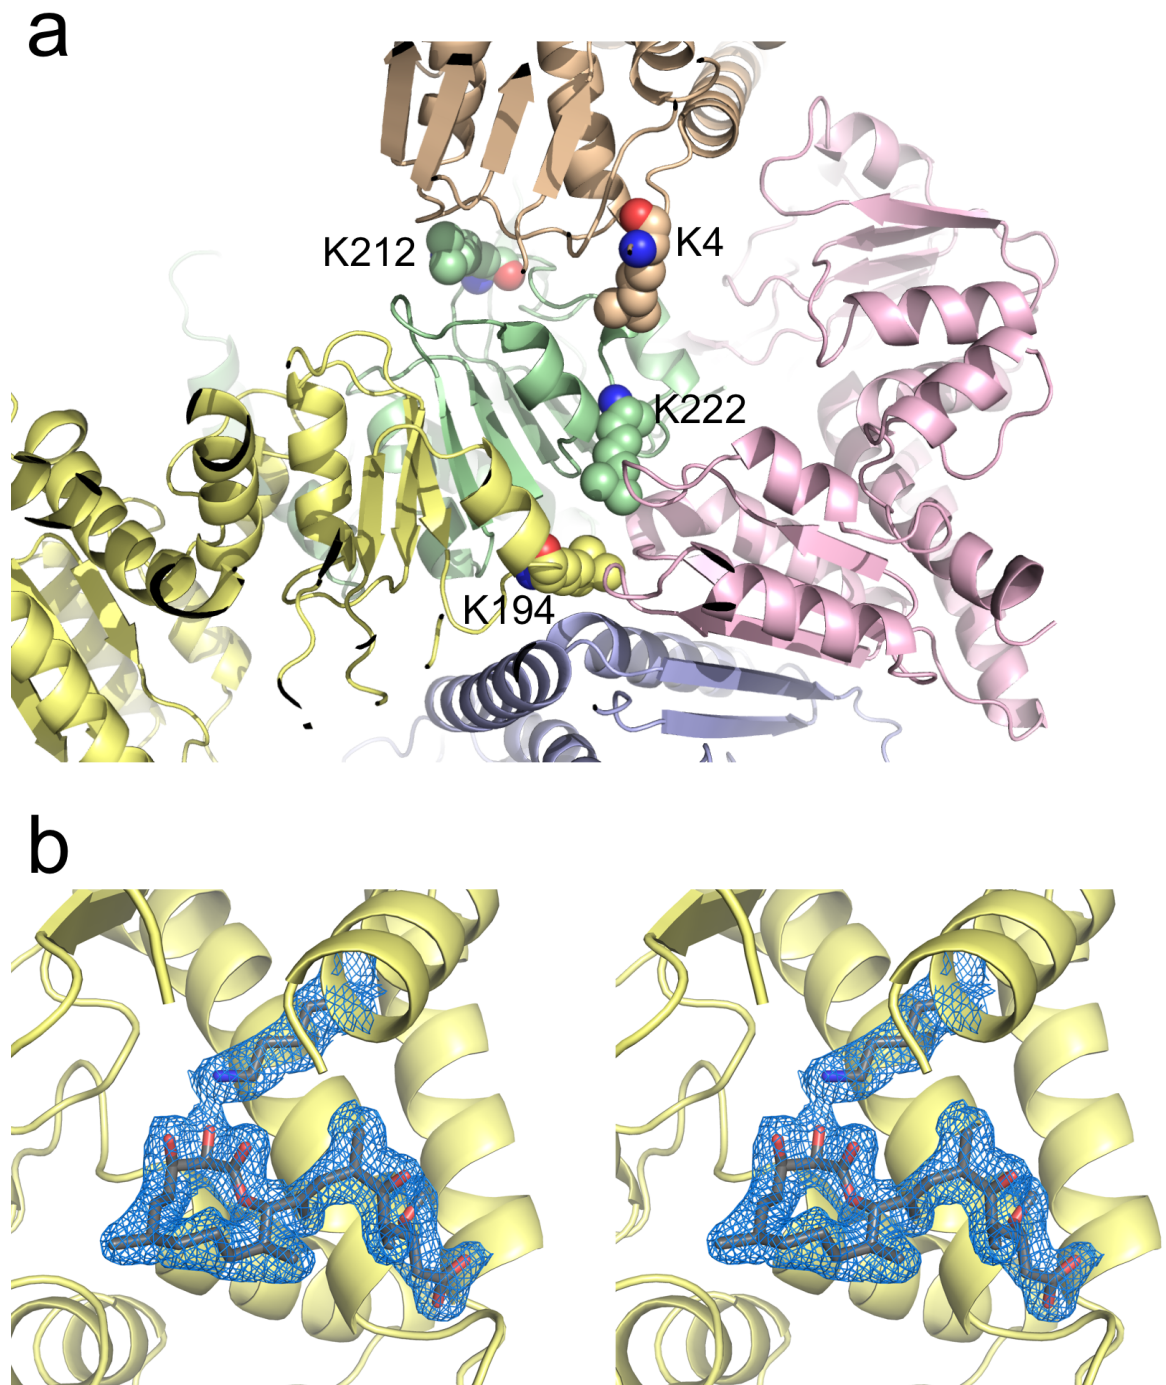

**Supplementary Figure 8.** (a) Lysine methylation is essential for the ecFold crystal structures reported in this study. ecFold protomers are shown as cartoon representations in individual colors. Dimethylated lysine residues involved in crystal contacts are shown as spheres with their color corresponding to the protomer they belong to. (b) Stereo view of the 2Fo-Fc electron density map for carolacton and K54. ecFold is shown as a yellow cartoon, carolacton and K54 as sticks and the electron density as a blue isomesh.



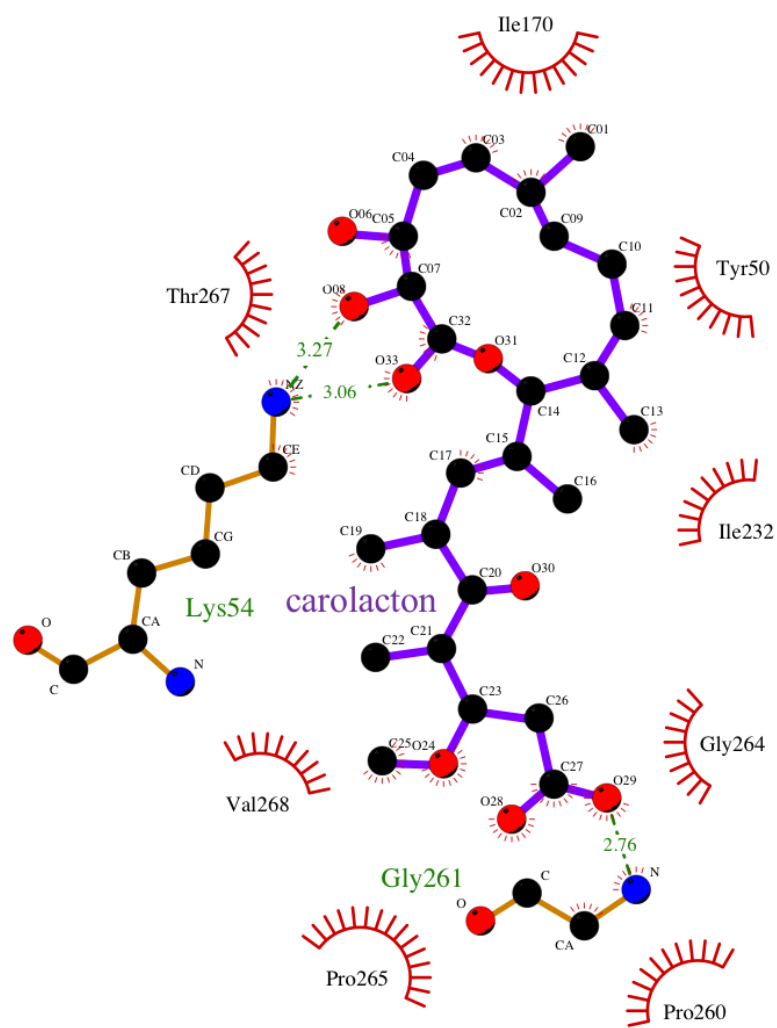

**Supplementary Figure 9. Ligplot diagram showing the detailed interactions of carolacton with ecFOLD.**

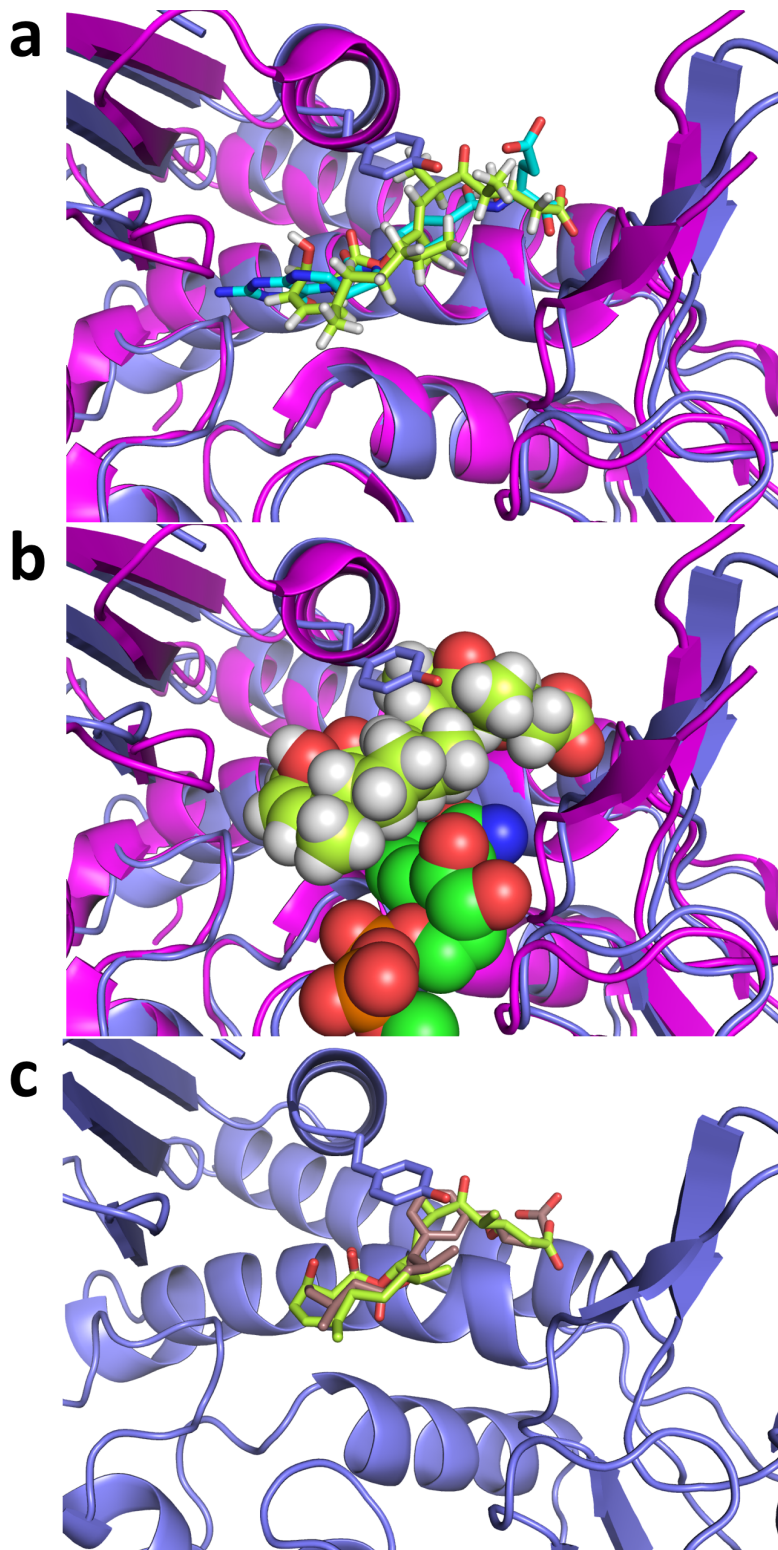

**Supplementary Figure 10. Superposition of ecFold (blue) with hsMTHFD2 (PDB ID 1DIA, magenta).** (a) Carolacton (lime) clashes with the bound substrate analog L345899 (cyan). (b) carolacton clashes with co-factor NAD<sup>+</sup> (green). (c) New carolacton analog “carylacton” can engage with Y50 but has a tail which is too long to hydrogen-bond with G261.

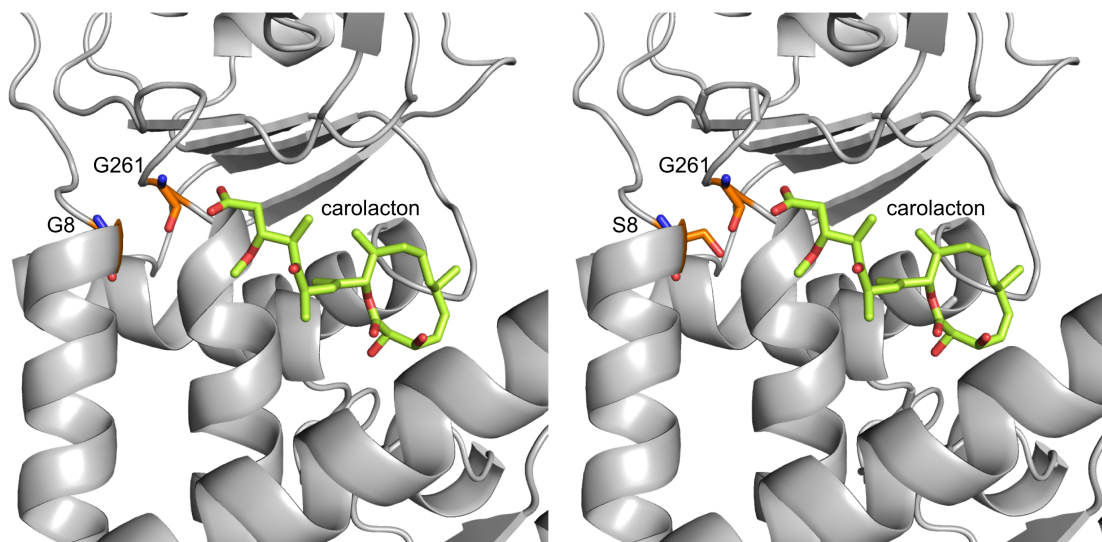

**Supplementary Figure 11. Effect of mutation G8S on carolacton binding of ecFold.** **Left:** In wt ecFold (gray) G8 is hydrogen-bonded to G261 (both orange), which in turn forms hydrogen bonds with carolacton (lime). **Right:** In the mutant G8S, the side-chain of the serine clashes with G261 in all conformations. Therefore, the loop containing G261 needs to move to accommodate S8, which results in a clash with carolacton.

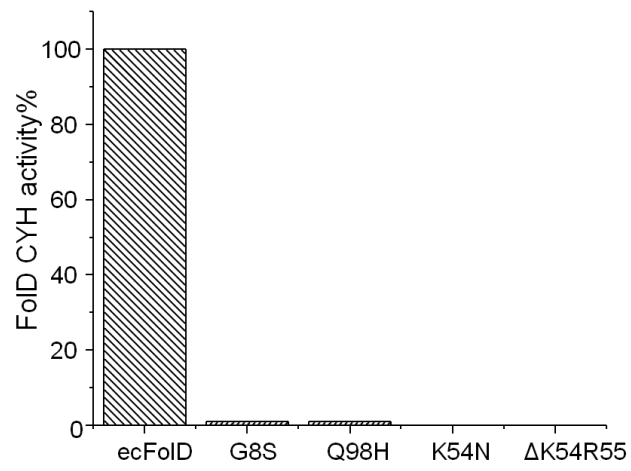

**Supplementary Figure 12. Comparison of ecFoID CYH activity between wt and the carolacton-resistant mutants.**

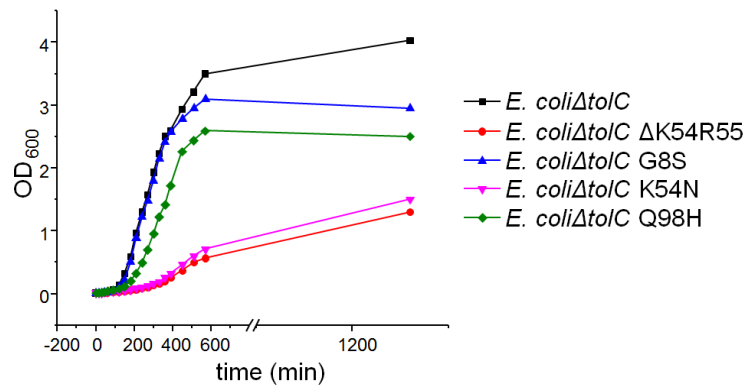

**Supplementary Figure 13. Growth curves of *E. coli*  $\Delta tolC$  and its carolacton-resistant mutant strains.**

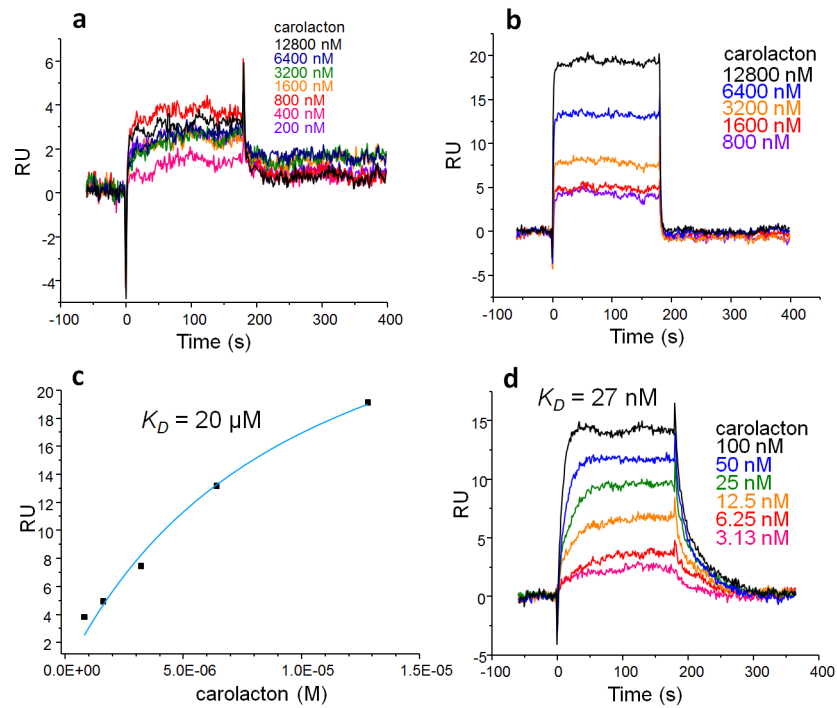

**Supplementary Figure 14. SPR assays of spFold and ecFold mutants with carolacton. (a)** SPR analysis shows carolacton does not bind to ecFoldDK54N. **(b)** SPR analysis shows carolacton has weak binding to ecFoldQ98H, the dissociation of carolacton is much faster than wt ecFold, but the  $K_D$  cannot be determined uniquely by SPR kinetics calculations. **(c)** The affinity calculation based on SPR analysis of carolacton binding to ecFold Q98H gives a  $K_D$  which is 20  $\mu\text{M}$ . **(d)** SPR analysis of carolacton binding to spFold.

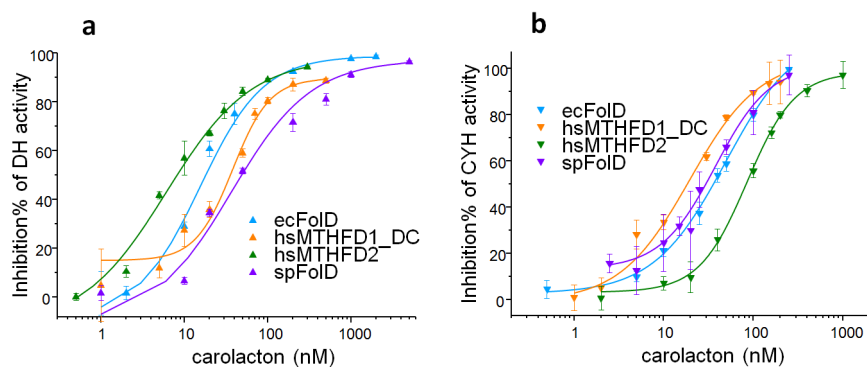

**Supplementary Figure 15. The determination of  $IC_{50}$  for carolacton inhibition against all wt FoIDs in this study.** Data are presented as means  $\pm$  s.e.m of 3 independent replicates.  $IC_{50}$  values were obtained via logistic dose-response fitting. The one-way ANOVA test was used for statistical analysis,  $P < 0.01$ . **(a)**  $IC_{50}$  determination for carolacton against the dehydrogenase activity of FoID from different organisms. **(b)**  $IC_{50}$  determination for carolacton against the cyclohydrolase activity of FoID from different organisms.

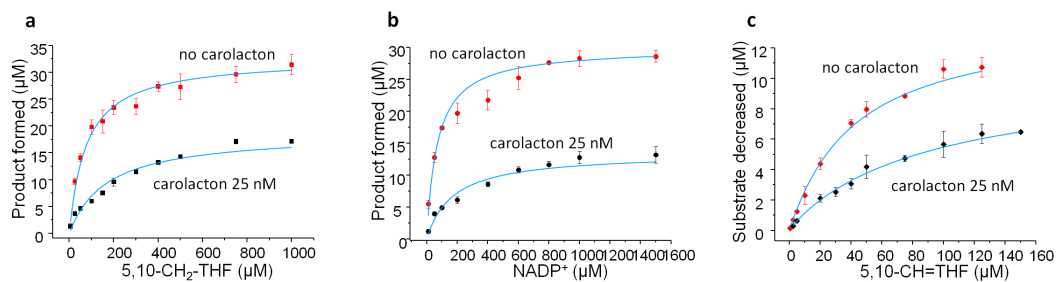

**Supplementary Figure 16. Enzyme kinetics of spFold.** Data are presented as means  $\pm$  s.e.m of 3 independent replicates. Enzyme specific activity values were calculated based on the  $V_{max}$  values obtained via Michaelis-Menten fitting. The one-way ANOVA test was used for statistical analysis,  $P < 0.01$ . (a) The determination of 5,10-CH<sub>2</sub>-THF  $K_M$  in the presence of 1 mM NADP and 5,10-CH<sub>2</sub>-THF apparent  $K_M$  in the presence of 1 mM NADP and 25 nM carolacton. (b) The determination of NADP  $K_M$  in the presence of 1 mM 5,10-CH<sub>2</sub>-THF and NADP apparent  $K_M$  in the presence of 1 mM 5,10-CH<sub>2</sub>-THF and 25 nM carolacton. (c) The determination of 5,10-CH=THF  $K_M$  and the determination of 5,10-CH=THF apparent  $K_M$  in the presence of 25 nM carolacton.



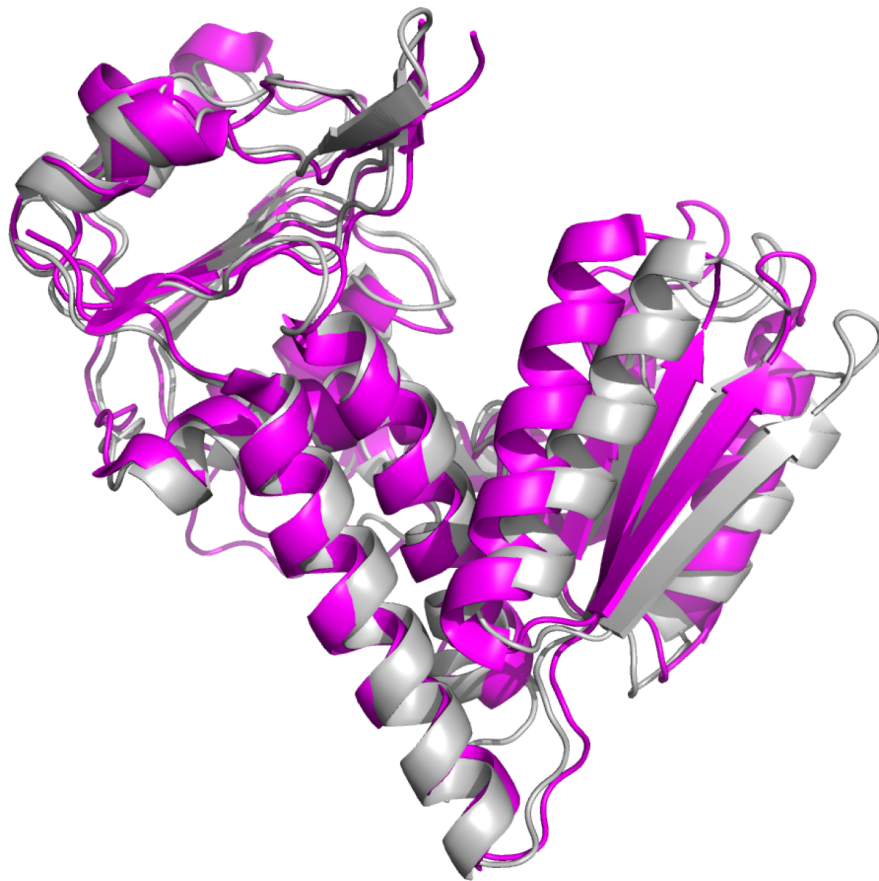

**Supplementary Figure 17. Superposition of ecFold (gray) with human mitochondrial hsMTHFD2 (PDB ID 5TC4, magenta).**

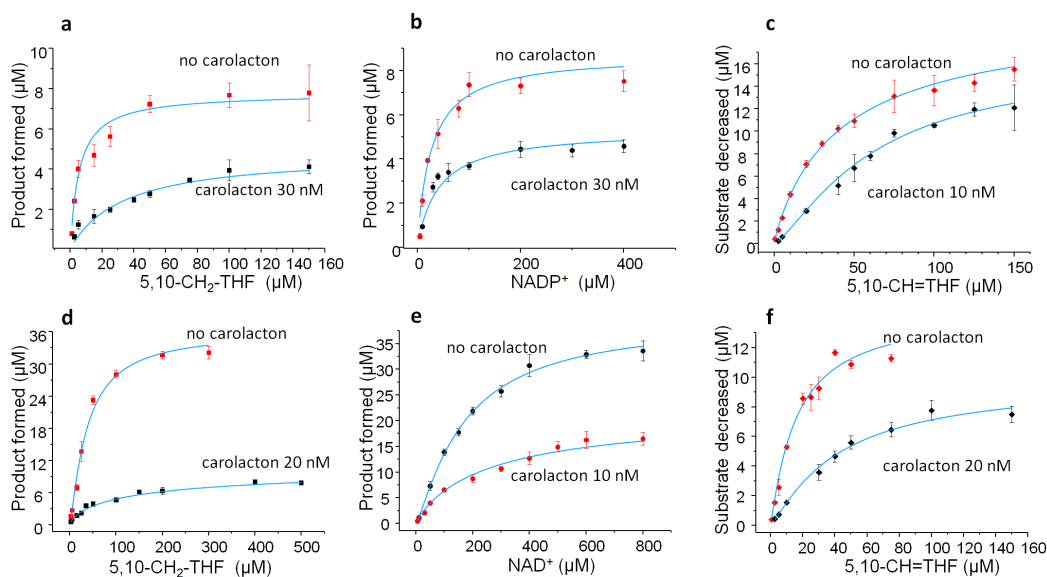

**Supplementary Figure 18. The enzyme kinetics measurement of hSMTHFD1\_DC and hSMTHFD2.** Data are presented as means  $\pm$  s.e.m of 3 independent replicates. Enzyme specific activity values were calculated based on the  $V_{max}$  values obtained via Michaelis-Menten or Hill fitting. The one-way ANOVA test was used for statistical analysis,  $P < 0.01$ . (a) The determination of 5,10-CH<sub>2</sub>-THF  $K_M$  for hSMTHFD1\_DC in the presence of 0.4 mM NADP and 5,10-CH<sub>2</sub>-THF apparent  $K_M$  for hSMTHFD1\_DC in the presence of 0.4 mM NADP and 30 nM carolacton. (b) The determination of NADP  $K_M$  for hSMTHFD1\_DC in the presence of 0.4 mM 5,10-CH<sub>2</sub>-THF and NADP apparent  $K_M$  for hSMTHFD1\_DC in the presence of 0.4 mM 5,10-CH<sub>2</sub>-THF and 25 nM carolacton. (c) The determination of 5,10-CH=THF  $K_M$  for hSMTHFD1\_DC and the determination of 5,10-CH=THF apparent  $K_M$  for hSMTHFD1\_DC in the presence of 25 nM carolacton. (d) The determination of 5,10-CH<sub>2</sub>-THF  $K_M$  for hSMTHFD2 in the presence of 0.6 mM NADP and 5,10-CH<sub>2</sub>-THF apparent  $K_M$  for hSMTHFD2 in the presence of 0.6 mM NADP and 20 nM carolacton. (e) The determination of NADP  $K_M$  for hSMTHFD2 in the presence of 0.6 mM 5,10-CH<sub>2</sub>-THF and NADP apparent  $K_M$  for hSMTHFD2 in the presence of 0.6 mM 5,10-CH<sub>2</sub>-THF and 10 nM carolacton. (f) The determination of 5,10-CH=THF  $K_M$  for hSMTHFD2 and the determination of 5,10-CH=THF apparent  $K_M$  for hSMTHFD2 in the presence of 20 nM carolacton.

**Supplementary Table 1.** Characteristics of data obtained during whole genome sequencing and analysis.

| <b>Sample</b>                   | Mutant 1                    | Mutant 2  | Mutant 3  | Mutant 4  | Mutant 5  | WT        |
|---------------------------------|-----------------------------|-----------|-----------|-----------|-----------|-----------|
| <b>Technology</b>               | MiSeq, Illumina, Paired-End |           |           |           |           |           |
| <b>Number of reads</b>          | 2,426,032                   | 2,423,998 | 2,376,598 | 2,513,800 | 2,314,528 | 2,372,346 |
| <b>Read Length, bp</b>          | 251                         |           |           |           |           |           |
| <b>Genome size, bp</b>          | 4,641,652 (expected)        |           |           |           |           |           |
| <b>Coverage (theoretical)</b>   | 131                         | 131       | 128       | 135       | 125       | 128       |
| <b>Coverage (post-assembly)</b> | 108                         | 108       | 108       | 116       | 107       | 109       |

**Supplementary Table 2.** List of mutations found in carolacton-resistant mutants (CaroM1-CaroM5) when compared to the control sample (WT).

| Gene                                                                                                          | Mutation       | CaroM1 | CaroM2 | CaroM3 | CaroM4 | CaroM5 | WT |
|---------------------------------------------------------------------------------------------------------------|----------------|--------|--------|--------|--------|--------|----|
| bifunctional 5,10-methylenetetrahydrofolate dehydrogenase/5,10-methenyltetrahydrofolate cyclohydrolase (FolD) | G8S            |        | +      | +      |        |        |    |
|                                                                                                               | K54N           |        |        |        | +      |        |    |
|                                                                                                               | Q98H           |        |        |        |        | +      |    |
|                                                                                                               | K54_K56delinsK | +      |        |        |        |        |    |

**Supplementary Table 3.** The specific activity of dehydrogenase and cyclohydrolase of bacterial FOLD reported in current and previous studies.

| Bacteria                            | FOLD   | DH activity<br>(specific activity<br>$\mu\text{mol min}^{-1} \text{mg}^{-1}$ ) | CYH activity<br>(specific activity<br>$\mu\text{mol min}^{-1} \text{mg}^{-1}$ ) | Reference                     |
|-------------------------------------|--------|--------------------------------------------------------------------------------|---------------------------------------------------------------------------------|-------------------------------|
| <i>E. coli</i>                      | ecFOLD | $173.57 \pm 6.32$                                                              | $298.81 \pm 37.87$                                                              | This study                    |
| <i>Acinetobacter baumannii</i>      | abFOLD | $161.4 \pm 5.7$                                                                | $350.2 \pm 4.4$                                                                 | Eadsforth et al. <sup>1</sup> |
| <i>E. coli</i>                      | ecFOLD | 200                                                                            | 33                                                                              | D'Ari et al. <sup>2</sup>     |
| <i>E. coli</i>                      | ecFOLD | 31.2                                                                           | 6.12                                                                            | Dev et al. <sup>3</sup>       |
| <i>E. coli</i>                      | ecFOLD | 19                                                                             | 39                                                                              | Sah et al. <sup>4</sup>       |
| <i>Peptostreptococcus productus</i> | ppFOLD | 627                                                                            | ND                                                                              | Wohlfarth et al. <sup>5</sup> |
| <i>Clostridium formicoaceticum</i>  | cfFOLD | ND                                                                             | 469                                                                             | Clark et al. <sup>6</sup>     |

**Supplementary Table 4.** The inhibition constants of carolacton against all wt Fold in this study.

| enzyme            | carolacton inhibition on DH activity       |                                                 | carolacton inhibition on CYH activity |
|-------------------|--------------------------------------------|-------------------------------------------------|---------------------------------------|
|                   | $K_i$ (nM)<br>(5, 10-CH <sub>2</sub> -THF) | $K_i$ (nM)<br>(NADP <sup>+</sup> ) <sup>a</sup> | $K_i$ (nM)<br>(5, 10-CH=THF)          |
| ecFold            | 21.31                                      | 10.91                                           | 31.60                                 |
| spFold            | 42.18                                      | 34.21                                           | 38.07                                 |
| hsMTHFD1<br>DC301 | 5.93                                       | 58.69                                           | 20.59                                 |
| hsMTHFD2          | 6.42                                       | 16.69                                           | 12.67                                 |

<sup>a</sup> it is nicotinamide adenine dinucleotide (NAD<sup>+</sup>) in the case of hsMTHFD2

**Supplementary Table 5.** Binding kinetic information ( $k_{\text{on}}$  and  $k_{\text{off}}$ ) and  $K_D$  calculated by kinetics or affinity.

| Enzyme      | $k_{\text{on}}$ (1/Ms) | $k_{\text{off}}$ (1/s) | $K_D$ (M) (by kinetics) | $K_D$ (M) (by affinity) |
|-------------|------------------------|------------------------|-------------------------|-------------------------|
| ecFolD      | $1.043 \times 10^6$    | 0.01003                | $9.62 \times 10^{-9}$   | $8.76 \times 10^{-9}$   |
| spFolD      | $1.188 \times 10^6$    | 0.03156                | $26.57 \times 10^{-9}$  | $18.74 \times 10^{-9}$  |
| hsMTHFD2    | $1.170 \times 10^6$    | 0.02220                | $18.98 \times 10^{-9}$  | $14.44 \times 10^{-9}$  |
| ecFolD Q98H | $5.815 \times 10^4$    | 0.6084                 | $1.05 \times 10^{-5}$   | $1.95 \times 10^{-5}$   |

**Supplementary Table 6.** Data collection and refinement statistics

|                                                     | Apo-FoID <sup>Meth</sup> | FoID <sup>Meth</sup> -caro | FoID <sup>Meth</sup> Q98H |
|-----------------------------------------------------|--------------------------|----------------------------|---------------------------|
| <b>Data collection</b>                              |                          |                            |                           |
| Space group                                         | P1 2 <sub>1</sub> 1      | P1 2 <sub>1</sub> 1        | P1 2 <sub>1</sub> 1       |
| Cell dimensions                                     |                          |                            |                           |
| <i>a</i> , <i>b</i> , <i>c</i> (Å)                  | 99.6, 79.8, 101.4        | 99.7, 81.1, 101.0          | 100.1, 79.4, 101.8        |
| $\alpha$ , $\beta$ , $\gamma$ (°)                   | 90.0, 113.3, 90.0        | 90.0, 112.9, 90.0          | 90.0, 113.8, 90.0         |
| Resolution (Å)                                      | 1.89 (1.94-1.89)         | 2.10 (2.21-2.10)           | 1.90 (2.00-1.90)          |
| <i>R</i> <sub>merge</sub>                           | 8.4 (79.80)              | 9.1 (60.6)                 | 6.1 (54.1)                |
| <i>I</i> / $\sigma$ <i>I</i>                        | 17.9 (2.4)               | 10.4 (2.5)                 | 22.1 (4.4)                |
| Completeness (%)                                    | 99.8 (98.9)              | 98.9 (99.8)                | 98.9 (99.2)               |
| Redundancy                                          | 6.7 (6.5)                | 4.4 (4.5)                  | 9.7 (9.9)                 |
| <b>Refinement</b>                                   |                          |                            |                           |
| Resolution (Å)                                      | 36.59 - 1.89             | 45.88 - 2.10               | 46.56 - 1.90              |
| No. reflections                                     | 116,659                  | 85,476                     | 113,624                   |
| <i>R</i> <sub>work</sub> / <i>R</i> <sub>free</sub> | 0.190/0.216              | 0.175/0.206                | 0.186/0.198               |
| No. atoms                                           |                          |                            |                           |
| Protein                                             | 8640                     | 8441                       | 8658                      |
| Ligand/ion                                          |                          | 132                        |                           |
| Water                                               | 1014                     | 588                        | 876                       |
| <i>B</i> -factors                                   | 36.22                    | 42.23                      | 34.75                     |
| Protein                                             | 35.90                    | 41.65                      | 33.97                     |
| Ligand/ion                                          |                          | 69.76                      |                           |
| Water                                               | 38.92                    | 44.16                      | 42.51                     |
| R.m.s. deviations                                   |                          |                            |                           |
| Bond lengths (Å)                                    | 0.003                    | 0.005                      | 0.013                     |
| Bond angles (°)                                     | 0.65                     | 0.70                       | 1.11                      |



**Supplementary Table 7.** Enzyme kinetic parameters for all FolD enzymes in this study.

| enzyme         | Dehydrogenase             |                         |                                      |                                                           |                                                               |
|----------------|---------------------------|-------------------------|--------------------------------------|-----------------------------------------------------------|---------------------------------------------------------------|
|                | substrate                 | $K_m$ ( $\mu\text{M}$ ) | $k_{\text{cat}}$ ( $\text{s}^{-1}$ ) | $k_{\text{cat}}/K_m$ ( $\text{s}^{-1} \mu\text{M}^{-1}$ ) | Specific activity ( $\mu\text{mol min}^{-1} \text{mg}^{-1}$ ) |
| ecFold         | 5,10-CH <sub>2</sub> -THF | 76.47 ± 8.27            | 90.34 ± 3.29                         | 1.18                                                      | 173.57 ± 6.32                                                 |
|                | NADP                      | 186.51 ± 21.02          | 89.64 ± 3.54                         | 0.48                                                      | 172.22 ± 6.81                                                 |
| ecFold G8S     | 5,10-CH <sub>2</sub> -THF | 179.44 ± 26.56          | 20.27 ± 1.75                         | 0.11                                                      | 35.67 ± 3.08                                                  |
|                | NADP                      | 510.80 ± 35.67          | 20.74 ± 0.71                         | 0.04                                                      | 36.50 ± 1.25                                                  |
| ecFold K54N    | 5,10-CH <sub>2</sub> -THF | 27.03 ± 1.85            | 18.19 ± 0.39                         | 0.67                                                      | 32.06 ± 0.39                                                  |
|                | NADP                      | 173.31 ± 21.66          | 16.00 ± 0.40                         | 0.09                                                      | 28.20 ± 0.68                                                  |
| ecFold ΔK54R55 | 5,10-CH <sub>2</sub> -THF | 61.75 ± 7.29            | 0.81 ± 0.03                          | 0.01                                                      | 1.44 ± 0.06                                                   |
|                | NADP                      | 675.63 ± 86.00          | 1.16 ± 0.06                          | 0.0017                                                    | 2.06 ± 0.11                                                   |
| ecFold Q98H    | 5,10-CH <sub>2</sub> -THF | 160.57 ± 15.87          | 8.28 ± 0.34                          | 0.05                                                      | 14.58 ± 0.59                                                  |
|                | NADP                      | 311.53 ± 55.44          | 6.67 ± 0.45                          | 0.02                                                      | 11.75 ± 0.79                                                  |
| spFold         | 5,10-CH <sub>2</sub> -THF | 76.52 ± 9.25            | 68.10 ± 3.11                         | 0.89                                                      | 118.69 ± 5.42                                                 |
|                | NADP                      | 70.33 ± 5.53            | 62.30 ± 1.02                         | 0.89                                                      | 108.59 ± 1.77                                                 |
| hsMTHFD1 DC301 | 5,10-CH <sub>2</sub> -THF | 5.54 ± 0.66             | 4.32 ± 0.35                          | 0.78                                                      | 7.15 ± 0.59                                                   |
|                | NADP                      | 27.13 ± 6.55            | 4.85 ± 0.58                          | 0.18                                                      | 8.04 ± 0.96                                                   |
| hsMTHFD2       | 5,10-CH <sub>2</sub> -THF | 37.29 ± 8.05            | 15.04 ± 1.14                         | 0.40                                                      | 25.70 ± 1.95                                                  |
|                | NADP                      | 171.67 ± 9.28           | 33.12 ± 0.43                         | 0.19                                                      | 28.29 ± 0.74                                                  |
| enzyme         | Cyclohydrolase            |                         |                                      |                                                           |                                                               |
|                | substrate                 | $K_m$ ( $\mu\text{M}$ ) | $k_{\text{cat}}$ ( $\text{s}^{-1}$ ) | $k_{\text{cat}}/K_m$ ( $\text{s}^{-1} \mu\text{M}^{-1}$ ) | Specific activity ( $\mu\text{mol min}^{-1} \text{mg}^{-1}$ ) |
| ecFold         | 5,10-CH=THF               | 26.63 ± 6.77            | 155.53 ± 19.71                       | 5.84                                                      | 298.81 ± 37.87                                                |
| spFold         | 5,10-CH=THF               | 41.08 ± 8.38            | 91.33 ± 7.97                         | 2.22                                                      | 159.17 ± 13.88                                                |
| hsMTHFD1 DC301 | 5,10-CH=THF               | 42.61 ± 9.39            | 137.56 ± 13.93                       | 3.23                                                      | 227.79 ± 23.07                                                |
| hsMTHFD2       | 5,10-CH=THF               | 16.14 ± 3.69            | 242.44 ± 22.41                       | 15.02                                                     | 414.23 ± 38.29                                                |

**Supplementary Table 8.** The IC<sub>50</sub> and IC<sub>80</sub> values determined for carolacton inhibition on different FOLD enzymes in this study.

| enzyme         | carolacton inhibition on DH activity |                       | carolacton inhibition on CYH activity |                       |
|----------------|--------------------------------------|-----------------------|---------------------------------------|-----------------------|
|                | IC <sub>50</sub> (nM)                | IC <sub>80</sub> (nM) | IC <sub>50</sub> (nM)                 | IC <sub>80</sub> (nM) |
| ecFOLD         | 15.49                                | 52.22                 | 49.83                                 | 180.01                |
| ecFOLD G8S     | 86.49                                | 736.59                | ND                                    | ND                    |
| ecFOLD K54N    | ND <sup>a</sup>                      | ND                    | ND                                    | ND                    |
| ecFOLD ΔK54R55 | ND                                   | ND                    | ND                                    | ND                    |
| ecFOLD Q98H    | 313.21                               | 1931.66               | ND                                    | ND                    |
| spFOLD         | 36.80                                | 168.90                | 38.09                                 | 101.34                |
| hsMTHFD1 DC301 | 38.05                                | 77.58                 | 19.45                                 | 67.54                 |
| hsMTHFD2       | 6.50                                 | 31.71                 | 85.73                                 | 201.78                |

<sup>a</sup> ND means not determined, because either the enzymatic activity is totally abolished or too low or the enzymatic activity is not affected.

**Supplementary Table 9.** Plasmids used in this study.

| <b>Plasmid</b>                   | <b>Relevant genotype</b>                                       | <b>Reference</b>       |
|----------------------------------|----------------------------------------------------------------|------------------------|
| pEHISTEV                         | kan <sup>R</sup>                                               | Liu, 2009 <sup>7</sup> |
| pEHISTEV:: <i>ecfold</i>         | pEHISTEV, kan <sup>R</sup> , <i>fold</i> <sub>Eco</sub>        | This work              |
| pEHISTEV:: <i>ecfold G8S</i>     | pEHISTEV, kan <sup>R</sup> , <i>fold</i> <sub>EcoG8S</sub>     | This work              |
| pEHISTEV:: <i>ecfold Q98H</i>    | pEHISTEV, kan <sup>R</sup> , <i>fold</i> <sub>EcoQ98H</sub>    | This work              |
| pEHISTEV:: <i>ecfold K54N</i>    | pEHISTEV, kan <sup>R</sup> , <i>fold</i> <sub>EcoK54N</sub>    | This work              |
| pEHISTEV:: <i>ecfold ΔK54R55</i> | pEHISTEV, kan <sup>R</sup> , <i>fold</i> <sub>EcoΔK54R55</sub> | This work              |
| pEHISTEV:: <i>spfold</i>         | pEHISTEV, kan <sup>R</sup> , <i>fold</i> <sub>Spn</sub>        | This work              |
| pEHISTEV:: <i>mthfd1_DC</i>      | pEHISTEV, kan <sup>R</sup> , <i>mthfd1_DC</i>                  | This work              |
| pEHISTEV:: <i>mthfd2</i>         | pEHISTEV, kan <sup>R</sup> , <i>mthfd2</i>                     | This work              |

**Supplementary Table 10.** Oligonucleotides used for constructing FoLD expression plasmids.

| Target gene                                                                   | Primer             | Sequences (5' to 3') <sup>a</sup>              |
|-------------------------------------------------------------------------------|--------------------|------------------------------------------------|
| <i>E. coli</i> Δ <i>tolC</i> <i>fold</i> , Q98H,<br>K54N, ΔK54R55 <i>fold</i> | ecFolD_NcoI_F      | ATAC <u>CCATGGGCGCAGCAAAGATTATTGACGGTAAAAC</u> |
|                                                                               | ecFolD_HindIII_R   | GTCA <u>AAGCTTTTACTCATCCTGTGGATCATGATAT</u>    |
| <i>E. coli</i> Δ <i>tolC</i> G8S <i>fold</i>                                  | G8S_NcoI_F         | ATAC <u>CCATGGGCGCAGCAAAGATTATTGACAGTAAAAC</u> |
|                                                                               | ecFolD_HindIII_R   | GTCA <u>AAGCTTTTACTCATCCTGTGGATCATGATAT</u>    |
| <i>S. pneumoniae</i> TIGR4<br><i>fold</i>                                     | spFolD_EcoRI_F     | TCCGA <u>ATTCACACAGATTATTGATGGGAAAAGCTTTA</u>  |
|                                                                               | spFolD_XhoI_R      | GCA <u>CTCGAGTTATTTCTATCCAATGTCCTAAGTG</u>     |
| <i>Mthfd1</i> <sup>b</sup>                                                    | hsMTHFD1_NcoI_F    | GCGCCATGGCTCCAGCAGAAATCCTGAA                   |
|                                                                               | hsMTHFD1_HindIII_R | CGCA <u>AAGCTTTC</u> ACTGAATCATCCACTTTCCT      |
| <i>mthfd2</i> (without signal<br>peptide region)                              | hsMTHFD2_EcoRI_F   | TCCGA <u>ATTCATGGAAGCTGTTGTCATTTCTGGAAG</u>    |
|                                                                               | hsMTHFD2_HindIII_R | CGCA <u>AAGCTTTTA</u> ATTAGTGGCTACCCCAA        |

<sup>a</sup>The underlined characters indicate the restriction sites introduced; <sup>b</sup>only dehydrogenase and cyclohydrolase encoding region

**Supplementary Table 11.** The buffers for protein purification

| Protein       | Lysis buffer                                                            | Elution buffer                                                           | Desalting buffer                                     | Gel filtration buffer                  |
|---------------|-------------------------------------------------------------------------|--------------------------------------------------------------------------|------------------------------------------------------|----------------------------------------|
| ecFold        | 20 mM Bis-Tris pH 6.8                                                   | 20 mM Bis-Tris pH 6.8                                                    | 20 mM Bis-Tris pH 6.8                                | 10 mM HEPES<br>150 mM NaCl<br>1mM TCEP |
| ecFoldG8S     | 150 mM NaCl                                                             | 150 mM NaCl                                                              | 150 mM NaCl                                          |                                        |
| ecFoldQ98H    | 20 mM imidazole                                                         | 250 mM imidazole                                                         |                                                      |                                        |
| ecFolDK54N    |                                                                         |                                                                          |                                                      |                                        |
| ecFolDAK54R55 |                                                                         |                                                                          |                                                      |                                        |
| spFold        | 20 mM Bis-Tris pH 6.8                                                   | 20 mM Bis-Tris pH 6.8                                                    | 20 mM Bis-Tris pH 6.8                                |                                        |
| MTHFD1_DC     | 200 mM NaCl<br>10% glycerol<br>20 mM imidazole<br>1 mM TCEP             | 200 mM NaCl<br>10% glycerol<br>250 mM imidazole<br>1 mM TCEP             | 200 mM NaCl<br>10% glycerol<br>1 mM TCEP             | 10 mM HEPES<br>150 mM NaCl             |
| MTHFD2        | 20 mM Tris-HCl pH 8.0<br>200 mM NaCl<br>10% glycerol<br>20 mM imidazole | 20 mM Tris-HCl pH 8.0<br>200 mM NaCl<br>10% glycerol<br>250 mM imidazole | 20 mM Tris-HCl pH 8.0<br>200 mM NaCl<br>10% glycerol | 1mM TCEP                               |

**Supplementary Table 12.** Ramachandran statistics for the ecFold structures after final refinement.

|                                  | <b>ecFold<sup>Meth</sup></b> | <b>ecFold<sup>Meth</sup>-carolacton</b> | <b>ecFold<sup>Meth</sup>Q98H</b> |
|----------------------------------|------------------------------|-----------------------------------------|----------------------------------|
| <b>Ramachandran favored (%)</b>  | 95.75                        | 97.14                                   | 96.77                            |
| <b>Ramachandran allowed (%)</b>  | 3.97                         | 2.77                                    | 3.05                             |
| <b>Ramachandran outliers (%)</b> | 0.27                         | 0.09                                    | 0.18                             |

## Supplementary References

1. Eadsforth, T.C., Maluf, F.V. & Hunter, W.N. Acinetobacter baumannii FOLD ligand complexes --potent inhibitors of folate metabolism and a re-evaluation of the structure of LY374571. *FEBS J* **279**, 4350–4360 (2012).
2. D'Ari, L. & Rabinowitz, J.C. Purification, characterization, cloning, and amino acid sequence of the bifunctional enzyme 5,10-methylenetetrahydrofolate dehydrogenase/5,10-methenyltetrahydrofolate cyclohydrolase from Escherichia coli. *J Biol Chem* **266**, 23953–23958 (1991).
3. Dev, I.K. & Harvey, R.J. A complex of N<sup>5</sup>,N<sup>10</sup>-methylenetetrahydrofolate dehydrogenase and N<sup>5</sup>,N<sup>10</sup>-methenyltetrahydrofolate cyclohydrolase in Escherichia coli. Purification, subunit structure, and allosteric inhibition by N<sup>10</sup>-formyltetrahydrofolate. *J Biol Chem* **253**, 4245–4253 (1978).
4. Sah, S. & Varshney, U. Impact of Mutating the Key Residues of a Bifunctional 5,10-Methylenetetrahydrofolate Dehydrogenase-Cyclohydrolase from Escherichia coli on Its Activities. *Biochemistry* **54**, 3504–3513 (2015).
5. Wohlfarth, G., Geerligs, G. & Diekert, G. Purification and characterization of NADP(+)-dependent 5,10-methylenetetrahydrofolate dehydrogenase from Peptostreptococcus productus marburg. *J. Bacteriol.* **173**, 1414–1419 (1991).
6. Clark, J.E. & Ljungdahl, L.G. Purification and properties of 5,10-methenyltetrahydrofolate cyclohydrolase from Clostridium formicoaceticum. *J Biol Chem* **257**, 3833–3836 (1982).
7. Liu, H. & Naismith, J.H. A simple and efficient expression and purification system using two newly constructed vectors. *Protein Expr Purif* **63**, 102–111 (2009).
